# Supplementary material
Source: PubMed Central journal article supplement (PMC2773967)
Supplement: 0905415106_0905415106SI.pdf [file 0905415106_0905415106SI.pdf]

# Supporting Information

Patwardhan et al. 10.1073/pnas.0905415106

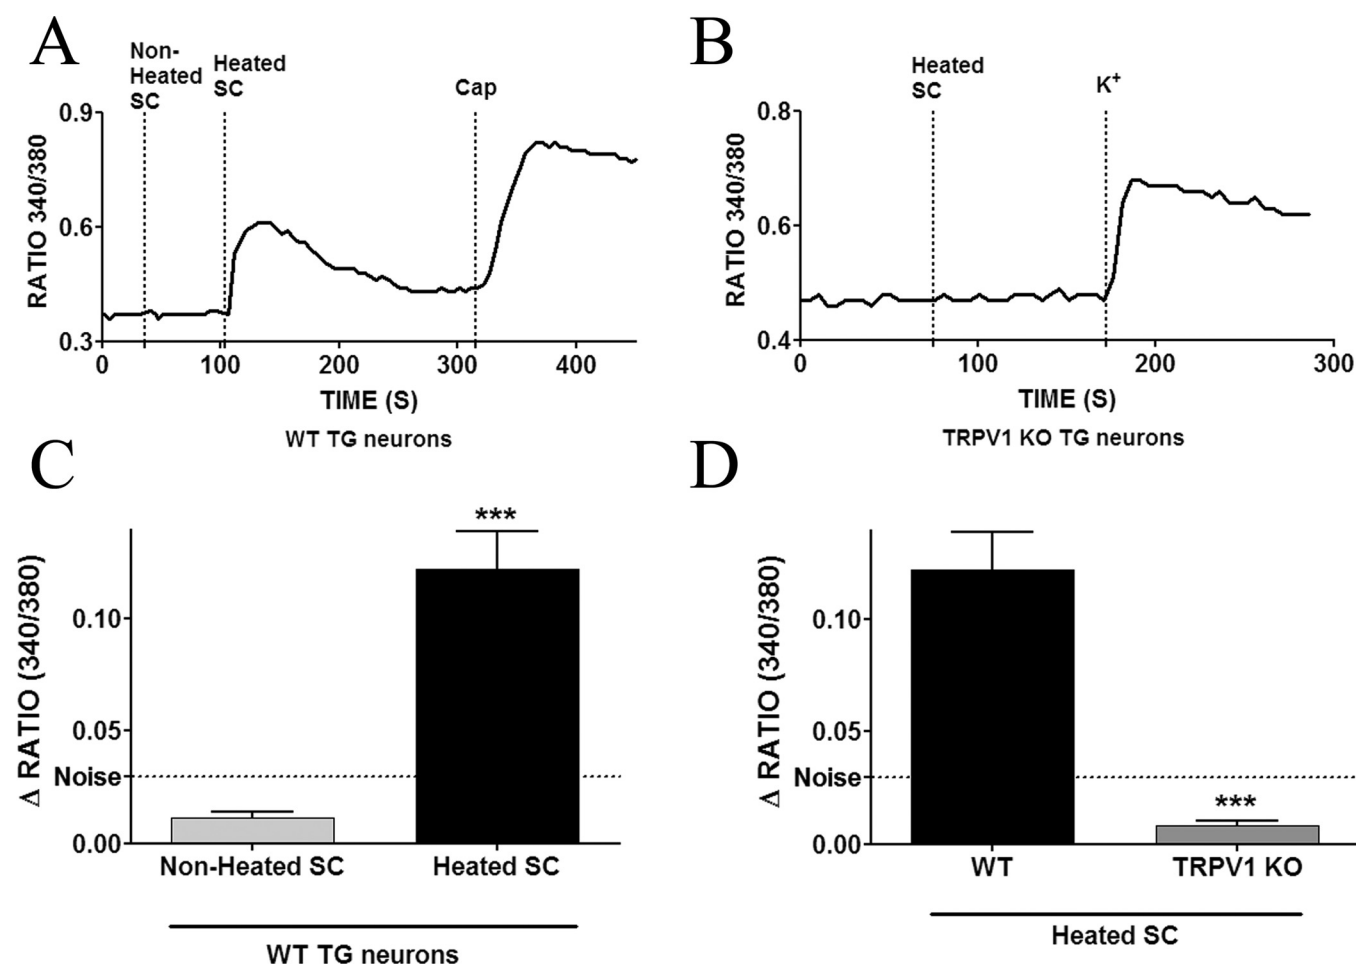

**Fig. S1.** Depolarization of isolated rat spinal cord with noxious heat releases endogenous TRPV1 agonist(s). (A) Freshly isolated rat spinal cords (9) were washed for 50 min in Hanks buffer and a basal sample (20 min in Hanks, 37 °C, Non-Heated-SC) was collected. Spinal cords were then depolarized with preheated buffer (20 min, 48 °C, Heated-SC). Both supernatants were passed through C<sub>18</sub> SepPak columns and washed with water/0.05 TFA. The substances adsorbed onto the column were eluted with 90% acetonitrile/0.05% TFA. The eluates were dried under a flow of nitrogen and reconstituted in Hanks buffer. Using a fura-2 calcium imaging set up, a representative tracer demonstrates the effect of the application of reconstituted eluates to a TG neuron from WT mice that also responded to capsaicin (100 nM). Ratiometric data are shown. (B) A representative tracer demonstrating the effect of the same eluate (from heat-depolarized spinal cords) to a neuron from TRPV1 KO mice. The viability of the cell was assessed using buffer containing 50 mM potassium. (C) Comparison of calcium accumulation in TG neurons from WT mice evoked by applying eluates from nonheated versus heat-depolarized spinal cords ( $n = 34$  for nonheated and 40 for heated SC eluate, \*\*\*, =  $P < 0.001$ ,  $t$ -test). (D) Comparison of calcium accumulation in in TG neurons from WT versus TRPV1 KO mice evoked by applying eluates from heat-depolarized spinal cords ( $n = 40$  for WT and 23 for KO neurons, \*\*\*, =  $P < 0.001$ ,  $t$ -test).

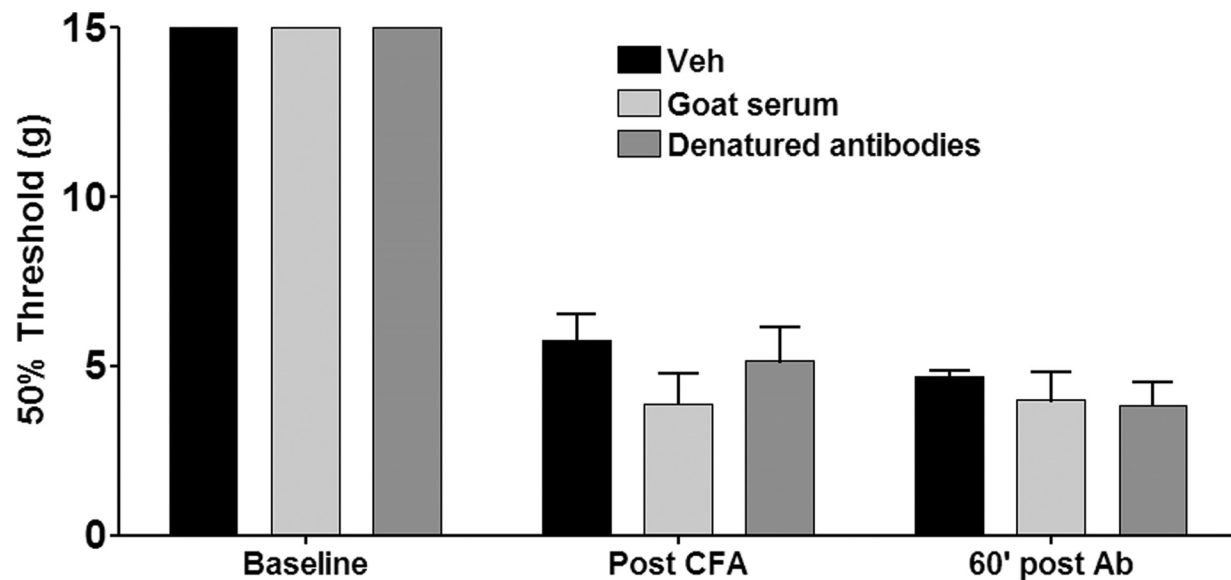

**Fig. S2.** Control studies demonstrating specificity of 9-HODE and 13-HODE antibodies. In an experimental design similar to Fig. 4C, tactile withdrawal thresholds were obtained for unilateral CFA injected animals 24 h post CFA treatment. Then the animals were injected either with vehicle, preimmune goat serum, or heat (95 °C) denatured antibodies against 9- and 13-HODE (30  $\mu$ g each). Paw withdrawal thresholds were obtained in both ipsilateral and contralateral paws 60 min after i.t. injections.
